# Supplementary material for: Designing a simple polymerisation route for homogeneous SiOx/C spheres as a lithium-ion battery anode
Source: Royal Society of Chemistry journal article supplement (doi:10.1039/d3nj00126a), 2023-01-01
Supplement: d3nj00126a1.pdf [file d3nj00126a1.pdf]

## Supporting Information

### **Designing the facile polymerization route for homogeneous SiO<sub>x</sub>/C spheres as a lithium-ion battery anode**

Xiaoming Zhou,<sup>a</sup> Yang Liu,<sup>\*a</sup> Liming Chen<sup>b</sup> and Guohui Yuan<sup>\*\*b</sup>

<sup>a</sup>*School of chemical engineering, Northeast Electric Power University, Jilin 132012, P. R. China*

<sup>b</sup>*School of chemistry and chemical Engineering, Harbin Institute of Technology, Harbin 150001, P. R. China*

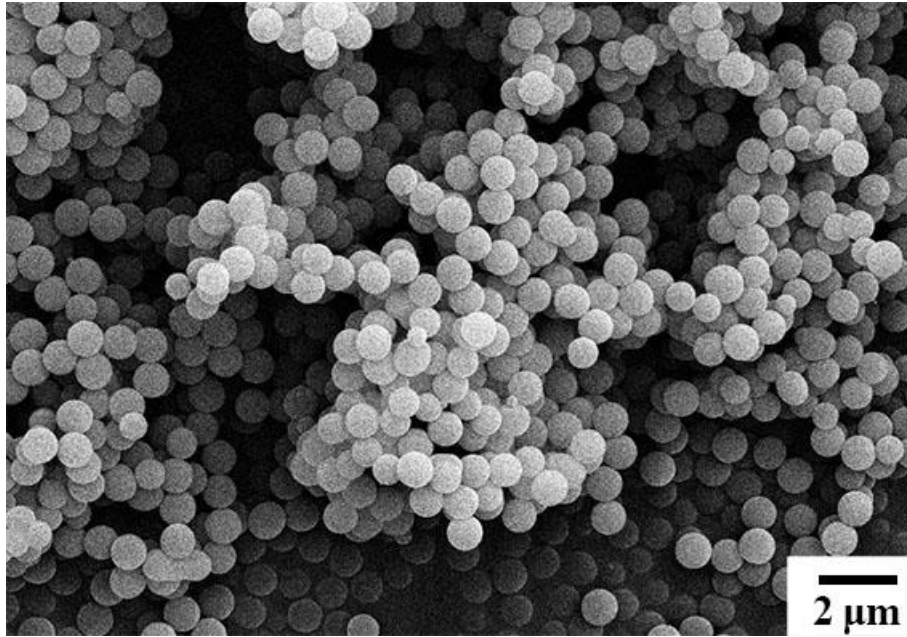

**Figure S1** SEM image of the polymer precursor.

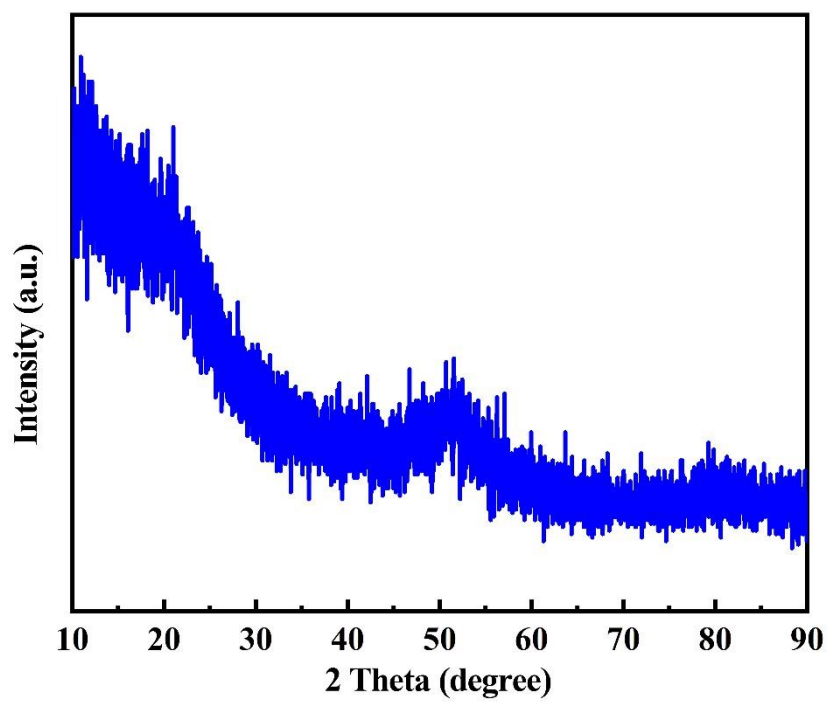

Figure S2 XRD patterns of polymer spheres.

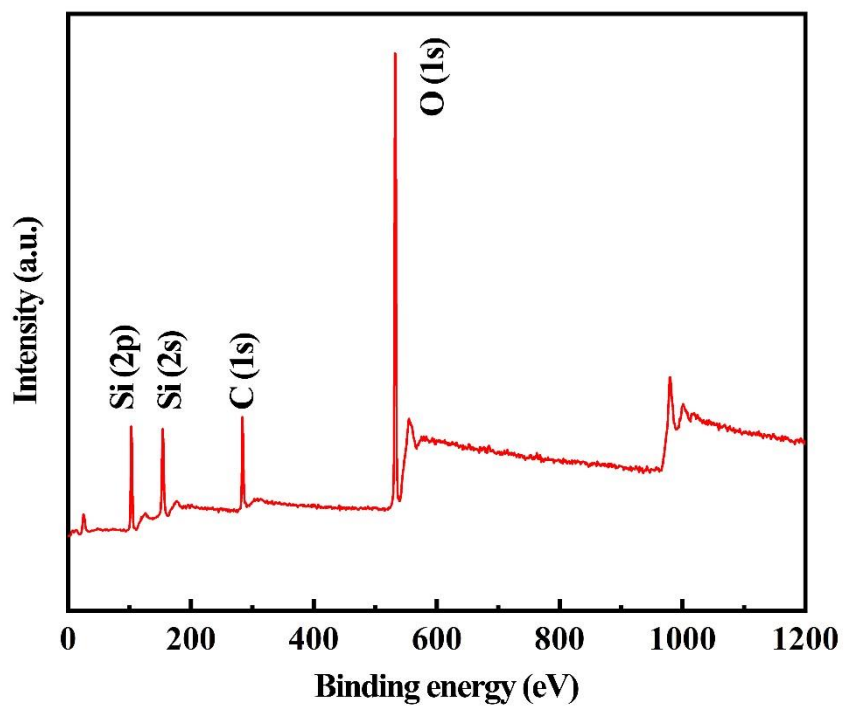

Figure S3 XPS full spectra of SiO<sub>x</sub>/C spheres.

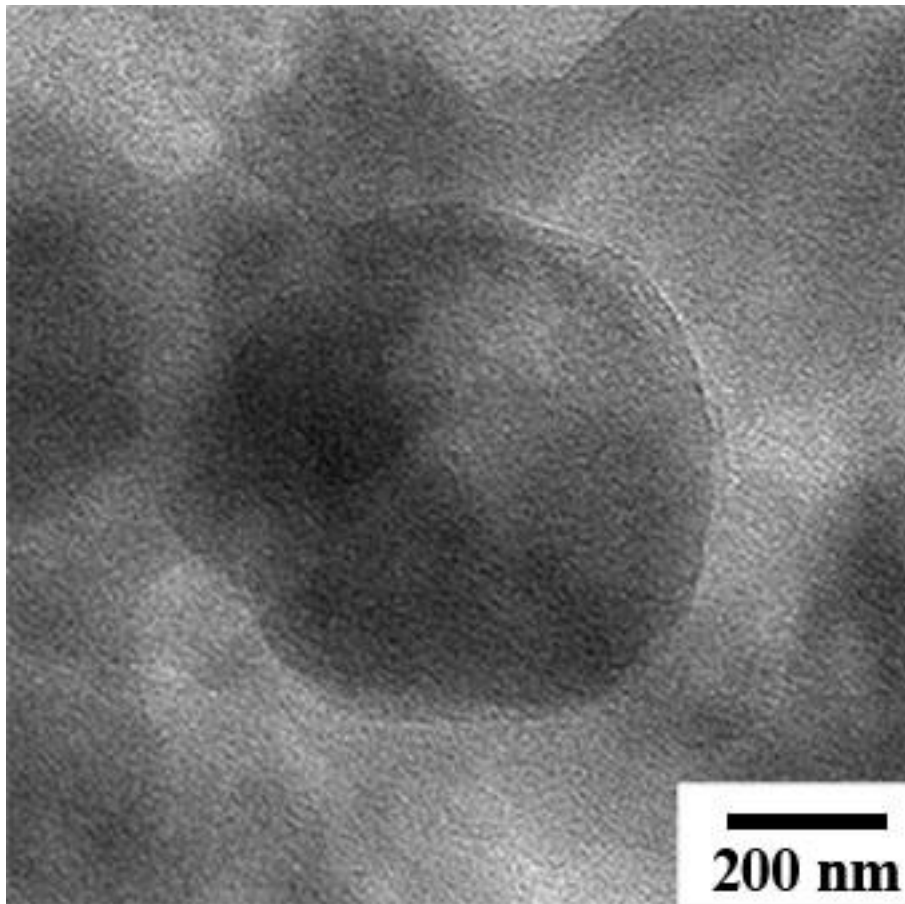

**Figure S4** TEM image of  $\text{SiO}_x/\text{C}$  spheres after the cycles.
